# Supplementary material
Source: PubMed Central journal article supplement (PMC3271389)
Supplement: supp_WNL.0b013e318206ca02_loring.pdf [file supp_WNL.0b013e318206ca02_loring.pdf]

# 토피라메이트 용량의 인지 기능에 대한 영향

무작위 이중 맹검 연구

Topiramate dose effects on cognition

A randomized double-blind study

D.W. Loring, PhD  
D.J. Williamson, PhD  
K.L. Meador, MD  
F. Wiegand, MD, PhD  
I. Hufnagel, MD

**배경:** 광범위 항간질제인 토피라메이트(topiramate, TPM)는 간질 환자와 건강한 자원자에서 신경인지기능장애(neuropsychological impairment)를 유발한다고 알려져 있다.

**목적:** TPM에 의하여 유발된 신경인지기능장애가 용량 의존적인 경향으로 나타나는지, 또한 초기(6주) 또는 후기(24주) 반응을 예측할 수 있는지 알아보고자 하였다.

**방법:** 본 연구는 24주에 걸친 이중 맹검, 위약 대조, 평행군, 용량 범위 연구(double-blind, placebo-controlled, parallel-group, dose-ranging study)로, 체중에 대한 TPM의 영향을 일차적으로 평가할 수 있도록 설계하였다. 인지학적으로 정상인 성인 188명을 대상으로, 컴퓨터화한 신경심리 평가를 실시하였다. 목표 용량은 하루에 64, 96, 192, 384 mg으로 정하였다. 컴퓨터화한 신경심리 종합 검사(Computerized Neuropsychological Test Battery)는 연구 시작 시, 6주, 12주, 24주에 시행하였다. 개인별 인지학적 변화는 변화 유의 지수(reliable change index, RCI) 분석을 통해 확인하였다.

**결과:** 신경심리학적 영향은 그룹 분석에서 용량 의존적 경향을 보였다( $p < 0.0001$ ). RCI 분석 결과, 용량이 높을수록 관련성을(dose-related effect) 보였고, 연구 대상자들의 12% (64 mg), 8% (96 mg), 15% (192 mg), 35% (384 mg)에서 신경심리학적 저하를 보인 반면, 위약군에서는 5%에서만 저하를 보였다. 6주째에 평가 결과로 24주째의 개인별 RCI 결과를 의미 있게 예측할 수 있었다.

**결론:** TPM과 관련한 인지장애는 용량 의존적 경향으로 나타난다. 특히 치료 24주 후에 인지장애를 보일 가능성이 높은 자들을 치료 초기(즉, 6주 이내)에 판별할 수 있었다. RCI 분석은 개인별 인지 기능의 위험을 정량화할 수 있는 중요한 접근법이 될 것이다.

**근거의 분류:** 본 연구는 TPM에 의하여 유발된 인지장애가 용량 의존적으로 발생하며, 이는 하루 192 mg ( $p < 0.01$ ) 과 384 mg ( $p < 0.0001$ )에서 통계적으로 유의한 영향을 보여 Class II 근거를 제시한다.
